# Supplementary material for: The replication-competent HIV reservoir is a genetically restricted, younger subset of the overall pool of HIV proviruses persisting during therapy, which is highly genetically stable over time
Source: PubMed Central journal article supplement (PMC10878278; doi:10.1128/jvi.01655-23), 2024-01-12
Supplement: jvi.01655-23-s0002.pdf [file jvi.01655-23-s0002.pdf]

**Table S1: Bayesian within-host phylogenetic inference details**

| Participant  | MCMC generations <sup>a</sup> | Phylogenies post burn-in | QC-passed phylogenies | $\Delta$ AIC <sup>b</sup> (median, IQR) | Phylogenetically estimated root date (95% HPD <sup>c</sup> ) | Within-host HIV evolutionary rate <sup>d</sup> (mean, 95%HPD)        |
|--------------|-------------------------------|--------------------------|-----------------------|-----------------------------------------|--------------------------------------------------------------|----------------------------------------------------------------------|
| <i>gp120</i> |                               |                          |                       |                                         |                                                              |                                                                      |
| 1            | 100                           | 15000                    | 7218                  | 488 (452 - 522)                         | Dec 1995 (Aug 1995 - Mar 1996)                               | $4.8 \times 10^{-5}$ ( $3.8 \times 10^{-5}$ - $6.0 \times 10^{-5}$ ) |
| 2            | 35                            | 5250                     | 3842                  | 588 (550 - 627)                         | May 2003 (Jan - Sep 2003)                                    | $5.9 \times 10^{-5}$ ( $4.2 \times 10^{-5}$ - $7.7 \times 10^{-5}$ ) |
| 3            | 30                            | 4500                     | 4500                  | 196 (181 - 213)                         | Nov 2001 (Jul 2001 - Mar 2002)                               | $5.9 \times 10^{-5}$ ( $4.2 \times 10^{-5}$ - $7.6 \times 10^{-5}$ ) |
| 4            | 40                            | 6000                     | 6000                  | 550 (525 - 574)                         | Feb 1995 (Oct 1994 - Jun 1995)                               | $6.7 \times 10^{-5}$ ( $5.5 \times 10^{-5}$ - $8.1 \times 10^{-5}$ ) |
| 5            | 10                            | 1500                     | 1500                  | 40 (34 - 48)                            | Dec 2008 (Oct 2008 - Feb 2009)                               | $9.4 \times 10^{-5}$ ( $5.3 \times 10^{-5}$ - $1.4 \times 10^{-4}$ ) |
| 6            | 20                            | 3000                     | 2528                  | 51 (45 - 60)                            | Jan 2007 (Sep 2006 - May 2007)                               | $8.1 \times 10^{-5}$ ( $6.1 \times 10^{-5}$ - $1 \times 10^{-4}$ )   |
| 7            | 10                            | 1500                     | 1278                  | 300 (273 - 328)                         | May 1999 (Jul 1998 - Dec 1999)                               | $2.3 \times 10^{-5}$ ( $1.7 \times 10^{-5}$ - $2.9 \times 10^{-5}$ ) |
| <i>gag</i>   |                               |                          |                       |                                         |                                                              |                                                                      |
| 1            | 15                            | 3000                     | 2992                  | 286 (254 - 317)                         | Feb 1995 (May - Nov 1995)                                    | $2.6 \times 10^{-5}$ ( $1.9 \times 10^{-5}$ - $3.2 \times 10^{-5}$ ) |
| 3            | 10                            | 1500                     | 1500                  | 261 (239 - 283)                         | Nov 2001 (May 2001 - May 2002)                               | $2.6 \times 10^{-5}$ ( $2 \times 10^{-5}$ - $3.5 \times 10^{-5}$ )   |
| 7            | 10                            | 1500                     | 1500                  | 230 (209 - 254)                         | Feb 1998 (Dec 1996 - Apr 1999)                               | $1.3 \times 10^{-5}$ ( $9.0 \times 10^{-5}$ - $1.6 \times 10^{-5}$ ) |

<sup>a</sup> jModelTest returned GTR+I+G (General Time Reversible model with Invariable site plus Gamma distribution with four rate categories) as the best-fit nucleotide substitution model for all participants' *gp120* and *gag* nucleotide sequence alignments.

<sup>b</sup>  $\Delta$ AIC, delta Akaike information criterion. A phylogeny required a  $\Delta$ AIC of  $\geq 10$  (where its root date was prior to the first plasma sampling) was considered evidence of a molecular clock signal (see methods).

<sup>c</sup> 95% HPD, 95% highest posterior density.

<sup>d</sup> Expressed in estimated substitutions per nucleotide site per day.
